# Supplementary material for: Amplitude-Integrated EEG Monitoring in Pediatric Intensive Care: Prognostic Value in Meningitis before One Year of Age
Source: MDPI journal article supplement (doi:10.3390/children9050668), 2022-05-05
Supplement: s1 [file s1]

## Supplementary materials

**Table S1.** PCPC score

| Clinical Features                                                                                                                                                                                                                                                                                                                           | Category                 | Score |
|---------------------------------------------------------------------------------------------------------------------------------------------------------------------------------------------------------------------------------------------------------------------------------------------------------------------------------------------|--------------------------|-------|
| Normal at age-appropriate level<br>School age child attends regular school classroom                                                                                                                                                                                                                                                        | normal                   | 1     |
| Conscious alert and able to interact at an age-appropriate level<br>School age child attending regular school classroom but grade perhaps not appropriate for age<br>May have a mild neurologic deficit                                                                                                                                     | mild disability          | 2     |
| Conscious<br>Sufficient cerebral function for age-appropriate independent activities of daily life<br>School age child attending special education classroom<br>May have learning deficit                                                                                                                                                   | moderate disability      | 3     |
| Conscious<br>Dependent on others for daily support because of impaired brain function                                                                                                                                                                                                                                                       | severe disability        | 4     |
| Any degree of coma without any of the criteria for brain death<br>Unawareness even if awake in appearance without interaction with the environment<br>cerebral unresponsiveness<br>No evidence of cortical function and not aroused by verbal stimuli<br>Possibly some reflexive responses spontaneous eye opening and/or sleep-wake cycles | coma or vegetative state | 5     |
| Apnea OR<br>Areflexia OR<br>Electroencephalographic (EEG) silence                                                                                                                                                                                                                                                                           | brain death              | 6     |

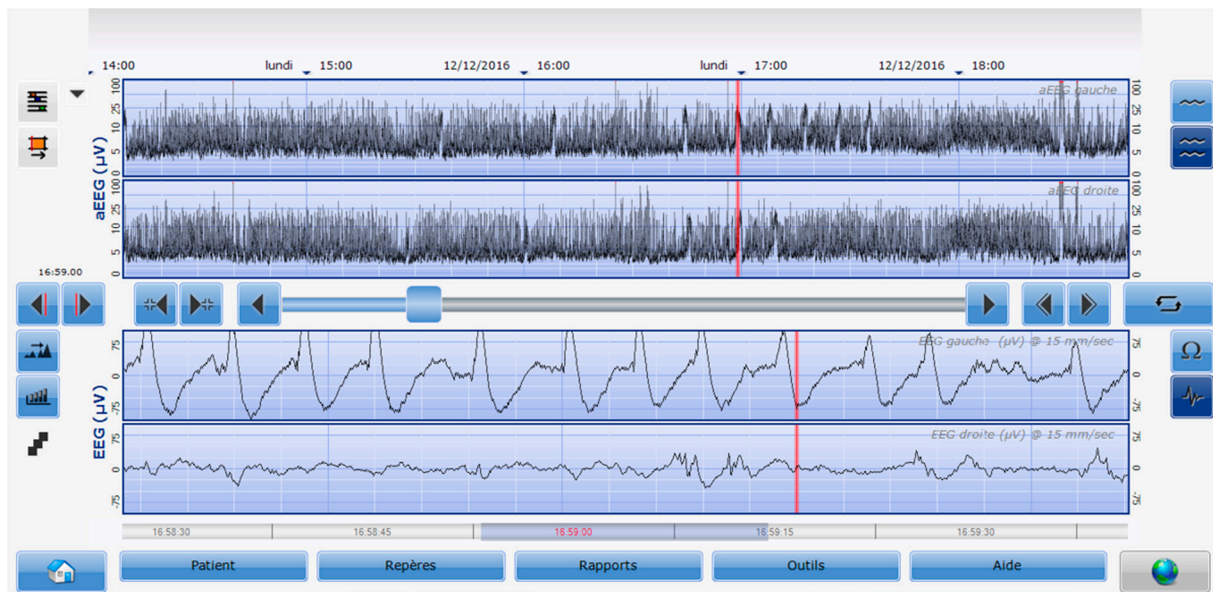

Figure S1. Example of seizure on aEEG trace.

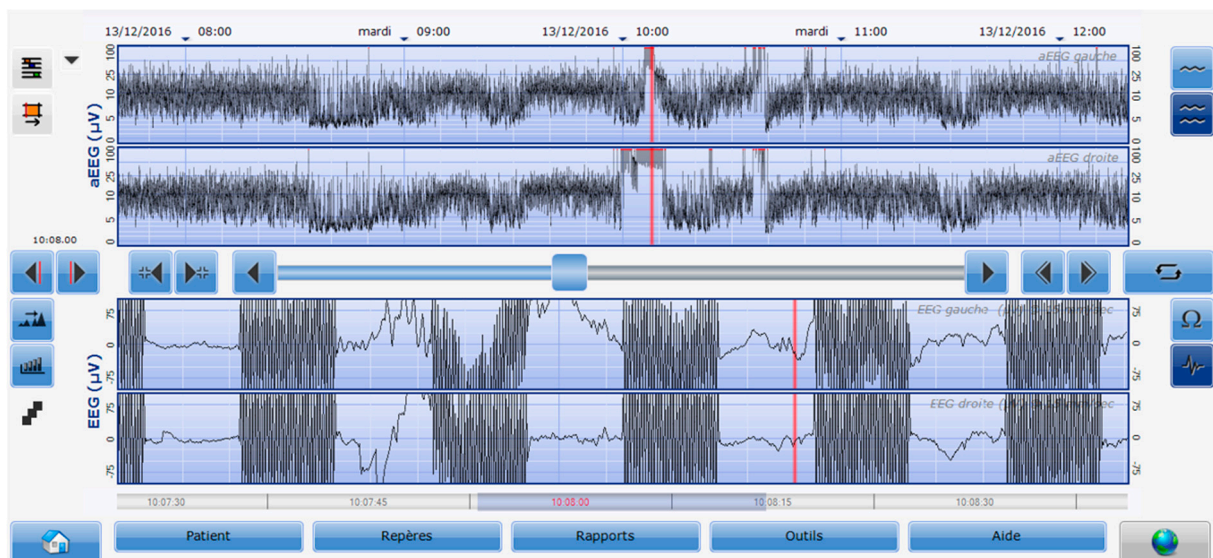

Figure S2. Example of a ventilation artifact.
